# Supplementary material
Source: publisher figshare collection journal article supplement (https://rs.figshare.com/ndownloader/files/20747484)
Supplement: Supplementary file 1 [file 20747484]

## Sheet: Sheet1
Table S3. Ancestral node support and ancestral state inferences. Data are presented for well-supported nodes of the Bradyrhizobium CHR and SI phylogenies.
Tree	Node Label	Bayesian support	Proportional likelihoods of ancestral states		Parsimony analysis
			Nodulation	Nitrogen fixation	Nodulation	Nitrogen fixation
CHR	1	1	0.9996	0.9981	1	1
CHR	2	1	1	1	1	1
CHR	3	1	1	1	1	1
CHR	4	0.87	1	1	1	1
CHR	5	1	0.9999	0.9996	1	1
CHR	6	0.99	0.9891	0.9887	1	1
CHR	7	1	0.9497	ND	1	1
CHR	8	0.95	1	1	1	1
CHR	9	1	0.8958	ND	1	1
CHR	10	1	0.9892	0.9997	1	1
CHR	11	1	0.9956	0.9751	1	1
CHR	12	1	1	1	1	1
CHR	13	1	0.9999	0.9995	1	1
CHR	14	1	1	1	1	1
CHR	15	1	0.9999	0.9996	1	1
CHR	16	1	1	1	1	1
CHR	17	1	0.8397	ND	1	0,1
CHR	18	0.95	0.9981	0.7391	1	1
CHR	19	1	0.9876	0.7778	1	1
CHR	20	1	0.9637	0.5994	1	1
CHR	21	1	0.9291	ND	1	1
CHR	22	0.9	0.9847	0.9534	1	1
CHR	23	0.93	0.9978	0.9854	1	1
CHR	24	0.83	0.998	0.9862	1	1
CHR	25	1	0.9942	0.9362	1	1
SI	1	1	NA	1	NA	1
SI	2	0.82	NA	1	NA	1
SI	3	0.99	NA	1	NA	1
SI	4	0.81	NA	1	NA	1
SI	5	0.82	NA	1	NA	1
SI	6	0.82	NA	1	NA	1
SI	7	1	NA	1	NA	1
SI	8	0.99	NA	1	NA	1
SI	9	0.91	NA	1	NA	1
SI	10	0.88	NA	1	NA	1
SI	11	0.93	NA	1	NA	1
SI	12	0.98	NA	0.99816	NA	1
SI	13	0.99	NA	0.99998	NA	1
SI	14	1	NA	1	NA	1
SI	15	0.96	NA	1	NA	1
SI	16	0.96	NA	1	NA	1
SI	17	0.82	NA	1	NA	1
SI	18	1	NA	1	NA	1
